# Supplementary material for: Co-delivery of dihydroartemisinin and docetaxel in pH-sensitive nanoparticles for treating metastatic breast cancerviathe NF-κB/MMP-2 signal pathway
Source: Royal Society of Chemistry journal article supplement (doi:10.1039/c8ra02833h), 2018-01-01
Supplement: c8ra02833h1.pdf [file c8ra02833h1.pdf]

Supporting Information

**Co-delivery of dihydroartemisinin and docetaxel in pH-sensitive nanoparticles for treating metastatic breast cancer via the NF- $\kappa$ B/MMP-2 signal pathway**

Jin Tao<sup>a</sup>, Zeng Tan<sup>a</sup>, Lu Diao<sup>a,b</sup>, Zhonghua Ji<sup>a</sup>, Jiahuan Zhu<sup>a</sup>, Wei Chen<sup>a</sup>, Ying Hu<sup>\*a,b</sup>

The D/D NPs were prepared with different formulation, and through the physical characteristic to obtain an optimal formulation.

Table S1 The characteristic of D/D NPs with different formulation

| Weight ratio of 4-arm-PEG-DTX/DHA | Particles (nm) | Size | PDI          | Encapsulation efficiency of DHA (%) | Drug loading of DHA (%) |
|-----------------------------------|----------------|------|--------------|-------------------------------------|-------------------------|
| 1:0                               | 123.5 ± 10.5   |      | 0.098 ± 0.04 |                                     |                         |
| 6:1                               | 410.8 ± 27.9   |      | 0.189 ± 0.10 | 50.2 ± 8.2                          | 7.1 ± 1.0               |
| 9:1                               | 192.3 ± 8.9    |      | 0.162 ± 0.08 | 68.3 ± 7.2                          | 6.8 ± 0.7               |
| 12:1                              | 142.5 ± 8.3    |      | 0.102 ± 0.03 | 90.1 ± 4.8                          | 7.5 ± 0.5               |
| 15:1                              | 138.8 ± 10.2   |      | 0.100 ± 0.05 | 93.2 ± 4.8                          | 6.0 ± 0.3               |
